# Supplementary material
Source: Elsevier journal article supplement (https://www.sciencedirect.com/science/article/pii/S0001731022001405)
Supplement: mmc1 [file S0001731022001405:mmc1.doc]

Declaración de autorías del trabajo titulado: **Perfil epidemiológico, clínico, y alérgico en pacientes con dermatitis atópica y dermatitis de las manos. Evaluación del Registro Español de Dermatitis de Contacto (REIDAC)**

Autor responsable: Verónica Mora-Fernández

| Nombre del autor | Concepción | Diseño | Adquisición de datos | Análisis | Interpretación de resultados | Escritura del manuscrito | Aprobación de la versión final |
| --- | --- | --- | --- | --- | --- | --- | --- |
| Verónica Mora-Fernández | x | X | X | X | X | X | X |
| Pedro Mercader Garcia | X |  | x | X | X | X | X |
| Leopoldo Borrego Hernando | X |  | x | X | X | X | X |
| Ricardo Gonzalez Pérez |  |  | x |  | X |  | x |
| Susana Córdoba Guijarro |  |  | X |  | X |  | X |
| Ana Maria Gimenez Arnau |  |  | X |  | X |  | X |
| Inmaculada Ruíz Gonzalez |  |  | X |  | X |  | X |
| Francisco Javier Miquel Miquel |  |  | X |  | X |  | X |
| Juan Francisco Silvestre Salvador |  |  | X |  | X |  | X |
| Francisco Javier Ortiz de Frutos |  |  | X |  | X |  | X |
| Tatiana Sanz Sanchez |  |  | X |  | X |  | X |
| Mercedes Rodriguez Serna |  |  | X |  | X |  | X |
| Virginia Fernández Redondo |  |  | X |  | X |  | X |
| Javier Sanchez Perez |  |  | X |  | X |  | X |
| Felipe Heras Mendaza |  |  | X |  | X |  | X |
| Esther Serra Baldrich |  |  | X |  | X |  | X |
| Violeta Zaragoza Ninet |  |  | X |  | X |  | X |
| Maria Antonia Pastor Nieto |  |  | X |  | X |  | X |
| Marcos Hervella Garcia |  |  | X |  | X |  | X |
| Ignacio Garcia Doval | x | x | x | x | X | x | X |
| Jose Manuel Carrascosa Carrillo | x | x | x | x | x | x | x |

Firmado: Verónica Mora-Fernández Fecha: 18/07/2021
